# Supplementary material for: The Invisible Evidence of Birth: Evaluating the Relationship Between Pelvic Shape and Parity with a Pelvic Pattern Index
Source: Research Square preprint supplement (doi:10.21203/rs.3.rs-7081944/v1), 2025-10-06
Supplement: Supplementary file 1 [file 039bb4ea2c9083c15a2e6cc1.docx]

**Supplementary Information 1: Sample composition**

The Invisible Evidence of Birth: Evaluating the Relationship Between Pelvic Shape and Parity with a Pelvic Pattern Index, Journal of Archaeological and Anthropological Sciences, Waltenberger, L.1,2,3*, Rebay-Salisbury, K. 1,2,3, Desideri, J.4, Mitteroecker, P.5,6, Spannagl-Steiner, M.7, Pany-Kucera, D.7

1Department of Prehistory and Historical Archaeology, University of Vienna, Franz-Klein-Gasse 1, 1190 Vienna, Austria

2Austrian Archaeological Institute, Austrian Academy of Sciences, Dominikanerbastei 16, 1010 Vienna, Austria

3Human Evolution and Archaeological Sciences, University of Vienna, Austria

4Archaeology of Africa and Anthropology (ARCAN), University of Geneva, 30 quai E. Ansermet, 1205 Geneva, Switzerland

5 Department of Evolutionary Biology, University of Vienna, Djerassiplatz 1, 1030 Vienna, Austria

6 Konrad Lorenz Institute for Evolution and Cognition Research, Martinstraße 12, 3400 Klosterneuburg, Austria

7 Department of Anthropology, Natural History Museum, Burgring 7, 1010 Vienna, Austria

*Corresponding author

Trait combinations of individuals showing three pelvic features (Tab. SI1-1) or four or more pelvic features (Tab. SI1-2). Tab. SI1-3 and Tab. SI1-4 present the absolute frequencies of the recorded scores of pelvic features in individuals exhibiting 3 or 4 and more features respectively.

Tab. SI1-1: Common trait combinations in individuals exhibiting three traits and its observed frequencies in the samples. Frequently observed combinations are highlighted.

| Pelvic features | | | | | | | Observations | | | |
| --- | --- | --- | --- | --- | --- | --- | --- | --- | --- | --- |
| Sacral pre-auricular extension or notch | Exostoses at the margin of the sacro-iliac joint | Exostoses at the ventral pubic surface | Lesions at the ventral pubic surface | Pre-auricular sulcus | Extended pubic tubercle | Dorsal pubic pitting | NMDID | Simon collection | Spitalfields collection | Total observations |
| present | present | present | - | - | - | - | 0 | 1 | 0 | 1 |
| present | - | present | present | - | - | - | 0 | 1 | 0 | 1 |
| present | present | - | - | present | - | - | 1 | 0 | 0 | 1 |
| present | present | - | - | present | - | - | 0 | 1 | 0 | 1 |
| present | - | present | - | present | - | - | 2 | 0 | 0 | 2 |
| - | present | present | - | present | - | - | 2 | 1 | 0 | 3 |
| present | present | - | - | - | present | - | 1 | 0 | 0 | 1 |
| present | - | - | present | present | - | - | 1 | 1 | 0 | 2 |
| - | present | - | present | present | - | - | 1 | 3 | 0 | 4 |
| - | - | present | present | present | - | - | 2 | 0 | 0 | 2 |
| - | present | - | - | present | present | - | 2 | 0 | 0 | 2 |
| - | - | present | - | present | present | - | 3 | 0 | 0 | 3 |
| present | - | - | - | present | - | present | 3 | 0 | 0 | 3 |
| - | - | - | present | present | present | - | 1 | 0 | 1 | 2 |
| - | present | - | - | present | - | present | 2 | 1 | 0 | 3 |
| - | - | present | - | present | - | present | 3 | 0 | 1 | 4 |
| - | - | - | present | present | - | present | 1 | 3 | 0 | 4 |
| - | - | - | - | present | present | present | 2 | 1 | 0 | 3 |

Tab. SI1-2: Common trait combinations in individuals exhibiting three traits and observed frequencies in the samples. Frequently observed combinations are highlighted.

| Pelvic features | | | | | | | Observations | | | |
| --- | --- | --- | --- | --- | --- | --- | --- | --- | --- | --- |
| Sacral pre-auricular extension or notch | Extended pubic tubercle | Exostoses at the margin of the sacro-iliac joint | Dorsal pubic pitting | Pre-auricular sulcus | Exostoses at the ventral pubic surface | Lesions at the ventral pubic surface | NMDID | Simon collection | Spitalfields collection | Total observations |
| present | present | present | present | - | - | - | 0 | 1 | 0 | 1 |
| present | present | present | - | present | - | - | 1 | 0 | 0 | 1 |
| present | present | present | present | present | - | - | 1 | 0 | 0 | 1 |
| present | present | present | - | present | present | - | 1 | 0 | 0 | 1 |
| present | present | - | present | - | present | - | 0 | 1 | 0 | 1 |
| present | present | - | - | present | present | - | 1 | 0 | 0 | 1 |
| present | - | present | - | present | present | - | 3 | 0 | 1 | 4 |
| present | present | present | present | present | present | - | 2 | 0 | 0 | 2 |
| present | present | - | present | present | present | - | 0 | 2 | 0 | 2 |
| - | present | present | present | present | - | - | 0 | 0 | 1 | 1 |
| - | present | present | present | present | present | - | 3 | 0 | 0 | 3 |
| present | present | - | - | present | - | present | 1 | 0 | 0 | 1 |
| - | present | - | present | present | present | - | 1 | 0 | 1 | 2 |
| - | - | present | present | present | present | - | 2 | 0 | 0 | 2 |
| present | present | - | - | present | present | present | 0 | 0 | 1 | 1 |
| present | - | - | present | present | present | present | 1 | 0 | 0 | 1 |
| - | present | present | present | present | present | present | 1 | 1 | 0 | 2 |
| - | present | - | present | present | present | Present | 1 | 0 | 0 | 1 |
| - | - | present | present | present | present | present | 0 | 0 | 1 | 1 |
| - | present | - | present | - | present | present | 0 | 1 | 0 | 1 |
| - | present | - | - | present | present | present | 1 | 1 | 0 | 2 |
| - | - | present | - | present | present | present | 1 | 0 | 0 | 1 |
| - | - | present | - | present | present | present | 0 | 0 | 1 | 1 |
| - | - | - | present | present | present | present | 1 | 0 | 0 | 1 |

Tab. SI1-3: Absolute frequencies of recorded expression scores of single pelvic features in individuals exhibiting three features.

| Score | Preauricular sulcus | Dorsal pubic Pitting | Extended pubic tubercle | Exostoses at the margin of the sacroiliac joint | Exostoses at the ventral pubic surface | Lesions at the ventral pubic surface | Sacral preauricular extension | Sacral preauricular notch |
| --- | --- | --- | --- | --- | --- | --- | --- | --- |
|  | | | | | | | | |
| NMDID *n* = 14 | | | | | | | | |
| 0 | 0 | 0 | 0 | 0 | 0 | 0 | 0 | 0 |
| 1 | 2 | 8 | 10 | 11 | 10 | 11 | 7 | 10 |
| 2 | 3 | 0 | 6 | 3 | 4 | 3 | 6 | 0 |
| 3 | 3 | 6 | - | - | - | - | 1 | 0 |
| 4 | 6 | - | - | - | - | - | - | - |
|  | | | | | | | | |
| Simon collection *n* = 2 | | | | | | | | |
| 0 | 0 | 0 | 0 | 0 | 0 | 0 | 0 | 0 |
| 1 | 0 | 0 | 1 | 0 | 2 | 1 | 2 | 2 |
| 2 | 1 | 1 | 1 | 2 | 0 | 1 | 0 | 0 |
| 3 | 1 | 1 | - | - | - | - | 0 | 0 |
| 4 | 0 | - | - | - | - | - | - | - |
|  | | | | | | | | |
| Spitalfields collection *n* = 2 | | | | | | | | |
| 0 | 0 | 0 | 0 | 0 | 0 | 0 | 0 | 0 |
| 1 | 1 | 0 | 1 | 2 | 1 | 1 | 2 | 2 |
| 2 | 1 | 2 | 1 | 0 | 1 | 1 | 0 | 0 |
| 3 | 0 | 0 | - | - | - | - | 0 | 0 |
| 4 | 0 | - | - | - | - | - | - | - |
| Sum | 15 | 10 | 8 | 5 | 5 | 5 | 7 |  |

Tab. SI1-4: Absolute frequencies of recorded expression scores of single pelvic features in individuals exhibiting at least four features.

| Score | Preauricular sulcus | Dorsal pubic Pitting | Extended pubic tubercle | Exostoses at the margin of the sacroiliac joint | Exostoses at the ventral pubic surface | Lesions at the ventral pubic surface | Sacral preauricular extension | Sacral preauricular notch |
| --- | --- | --- | --- | --- | --- | --- | --- | --- |
|  | | | | | | | | |
| NMDID *n* = 6 | | | | | | | | |
| 0 | 0 | 0 | 0 | 0 | 0 | 0 | 0 | 0 |
| 1 | 0 | 1 | 3 | 4 | 0 | 2 | 4 | 6 |
| 2 | 2 | 2 | 3 | 2 | 6 | 4 | 2 | 0 |
| 3 | 1 | 3 | - | - | - | - | 0 | 0 |
| 4 | 3 | - | - | - | - | - | - | - |
|  | | | | | | | | |
| Simon collection *n* = 2 | | | | | | | | |
| 0 | 0 | 0 | 0 | 0 | 0 | 0 | 0 | - |
| 1 | 0 | 1 | 1 | 0 | 1 | 2 | 1 | 2 |
| 2 | 1 | 0 | 1 | 2 | 1 | 0 | 1 | 0 |
| 3 | 1 | 1 | - | - | - | - | 0 | 0 |
| 4 | 0 | - | - | - | - | - | - | - |
|  | | | | | | | | |
| Spitalfields collection *n* = 3 | | | | | | | | |
| 0 | 0 | 0 | 0 | 0 | 0 | 0 | 0 | 0 |
| 1 | 2 | 0 | 0 | 2 | 1 | 2 | 1 | 3 |
| 2 | 0 | 1 | 3 | 1 | 2 | 1 | 2 | 0 |
| 3 | 1 | 2 | - | - | - | 0 | 0 | 0 |
| 4 | 0 | - | - | - | - | 0 | - | - |
| Summe | 9 | 9 | 7 | 5 | 9 | 5 | 3 |  |
