# Supplementary material for: The Invisible Evidence of Birth: Evaluating the Relationship Between Pelvic Shape and Parity with a Pelvic Pattern Index
Source: Research Square preprint supplement (doi:10.21203/rs.3.rs-7081944/v1), 2025-10-06
Supplement: Supplementary file 2 [file dd4ca5267fd70369c340d3ea.docx]

**Supplementary Information 2: PLS results of parous females**

The Invisible Evidence of Birth: Evaluating the Relationship Between Pelvic Shape and Parity with a Pelvic Pattern Index, Journal of Archaeological and Anthropological Sciences, Waltenberger, L.1,2,3*, Rebay-Salisbury, K. 1,2,3, Desideri, J.4, Mitteroecker, P.5,6, Spannagl-Steiner, M.7, Pany-Kucera, D.7

1Department of Prehistory and Historical Archaeology, University of Vienna, Franz-Klein-Gasse 1, 1190 Vienna, Austria

2Austrian Archaeological Institute, Austrian Academy of Sciences, Dominikanerbastei 16, 1010 Vienna, Austria

3Human Evolution and Archaeological Sciences, University of Vienna, Austria

4Archaeology of Africa and Anthropology (ARCAN), University of Geneva, 30 quai E. Ansermet, 1205 Geneva, Switzerland

5 Department of Evolutionary Biology, University of Vienna, Djerassiplatz 1, 1030 Vienna, Austria

6 Konrad Lorenz Institute for Evolution and Cognition Research, Martinstraße 12, 3400 Klosterneuburg, Austria

7 Department of Anthropology, Natural History Museum, Burgring 7, 1010 Vienna, Austria

*Corresponding author

We repeated the PLS containing only parous females (*p* = 0.026). The first PLS dimension accounted for 73% of the total squared covariance and is predominantly affected by the weighted PPI, age at death, and the number of birth events (Fig. SI2-1).

Fig. SI2-1: Loadings of age, the number of birth events, and the weighted PPI in the first dimension of the partial least squares (PLS) analysis. The sample contained solely parous females. The loadings were proportional to the covariance between each feature and the corresponding pelvis shape feature depicted in Fig. SI2-2.


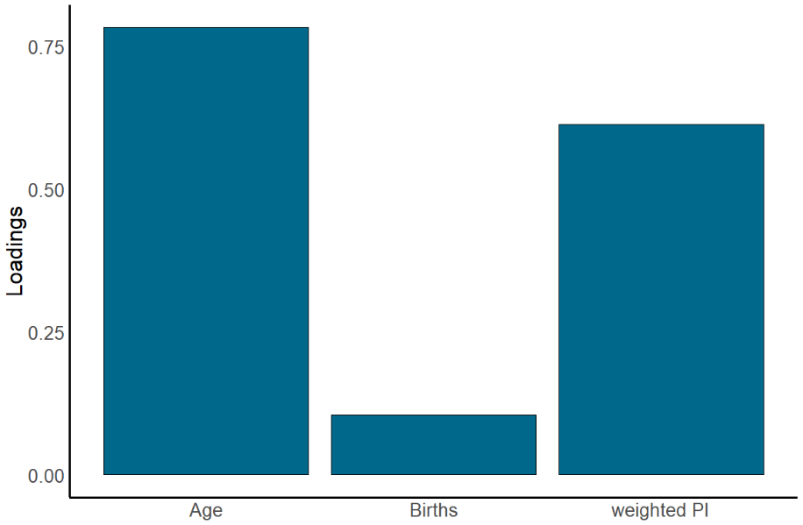


Individuals with a high PPI showed a platypelloid pelvic shape with a relative increase of the mediolateral pelvic canal, a small relative decrease of the anterior-posterior pelvic canal, and a relative increase of coxal height. The effect on the pelvic inlet was predominantly caused by a relatively broader sacrum and a relatively slight decrease of the width of the iliac blades. (Fig. SI2-2). Age was the strongest factor affecting the pelvic shape. The weighted PPI and the number of birth events were also significantly associated with the presented pelvic shape, although, lower than for age.

**
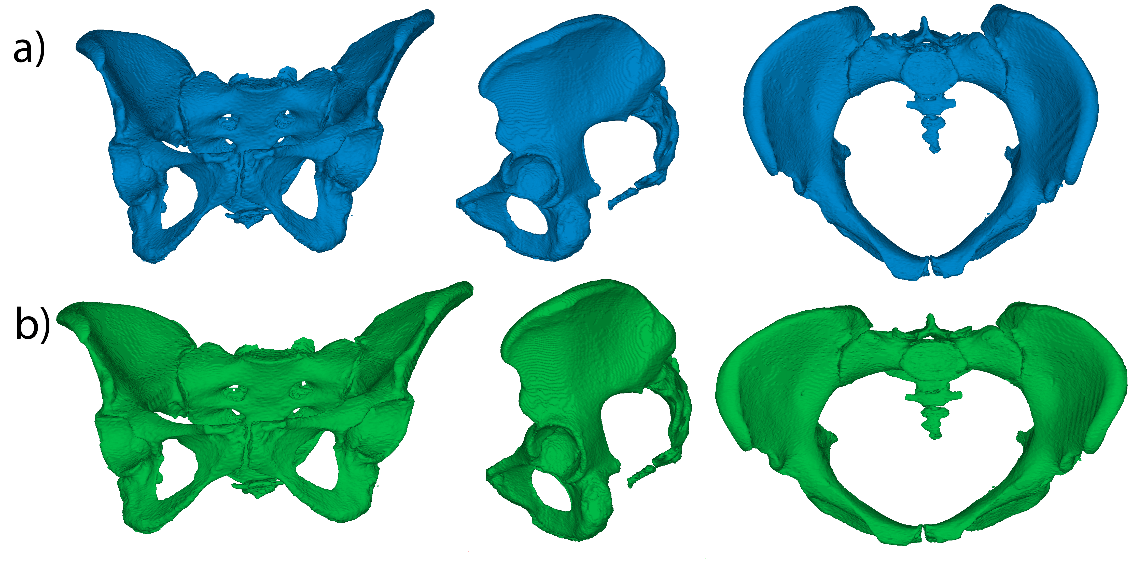
**

Fig. SI2-2: The pattern of pelvic shape changes along the first dimension of the partial least squares (PLS) analysis (compare Fig. SI2-1). The sample contains solely parous females. (a) Pelvic shape corresponding to a low score for age, the number of birth events, and the weighted PPI (extrapolation -4sd). (b) Pelvic shape corresponding to a high score for age, the number of birth events, and the weighted PPI (extrapolation +4sd). A relative increase of the mediolateral pelvic inlet caused by a wider sacrum, and an increase of the coxal height are associated with the tested variables.
